# Supplementary material
Source: PubMed Central journal article supplement (PMC6145461)
Supplement: NIHMS1500933-supplement-1.pdf [file NIHMS1500933-supplement-1.pdf]

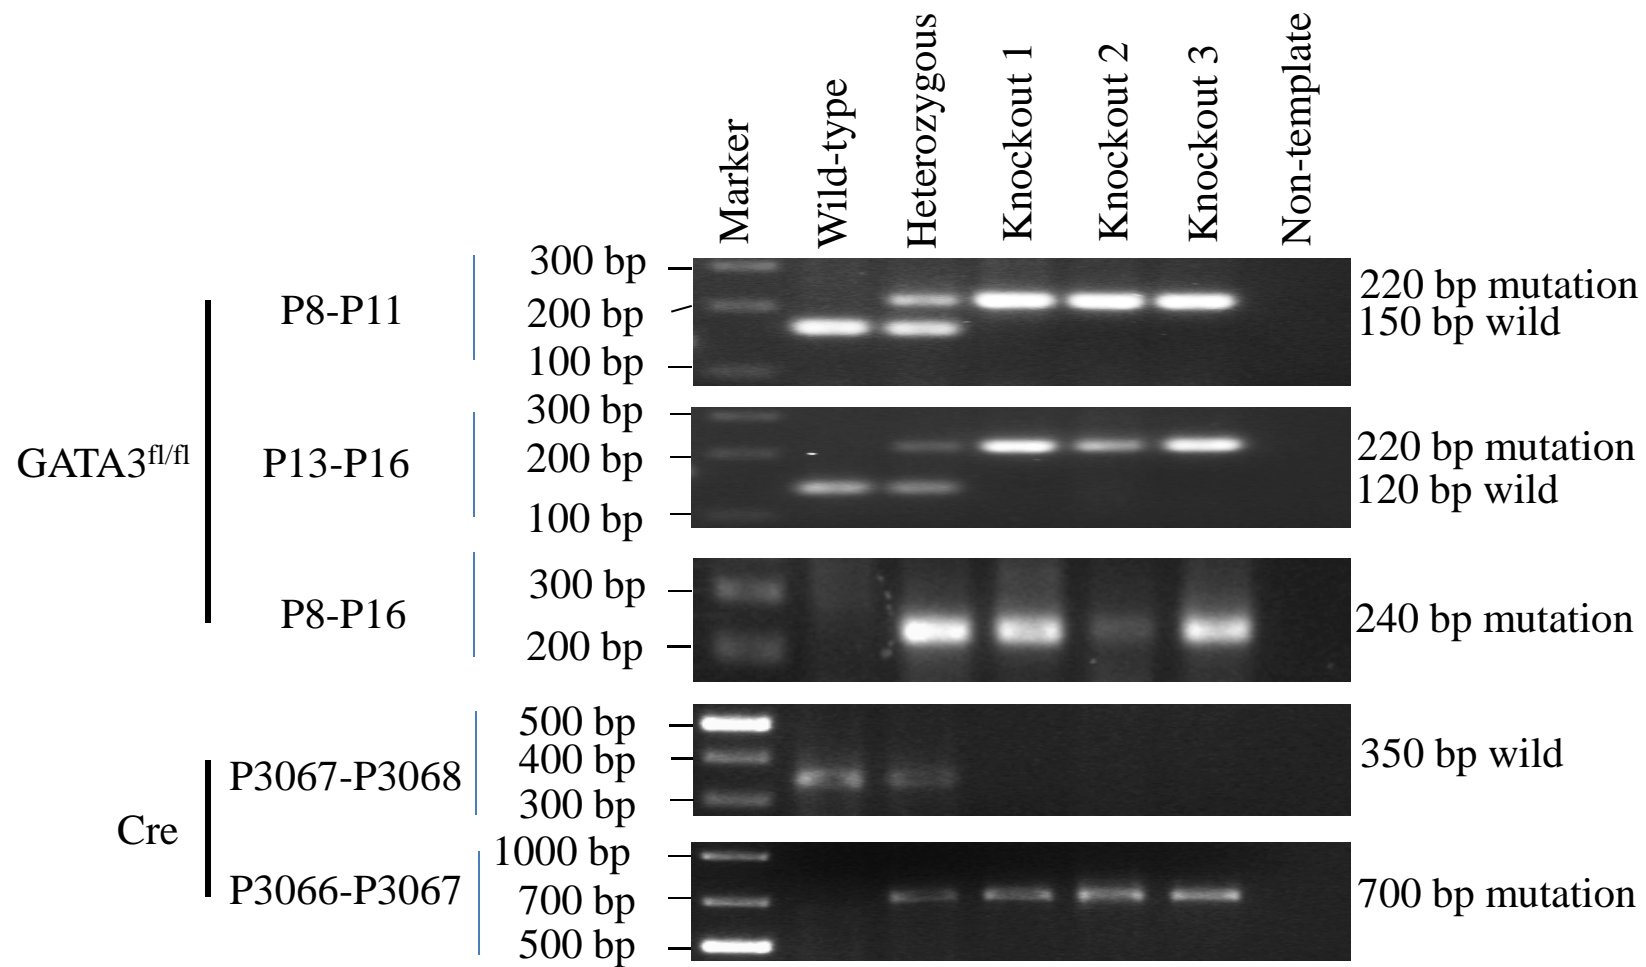

**Online Fig. 1**

**Online Fig. 1. Genotyping of mGATA3KO Mice.** The GATA3<sup>fl/fl</sup> mouse was generated by cloning the GATA3 exon 4 gene which is flanked by two loxP sites. Therefore, we used exon 4 (E4) and the loxP sites to determine the presence and deletion of GATA3 in myeloid cells. Mice carrying either the GATA3 floxed allele or the GATA3 deleted allele were identified by PCR with the following primer pairs: P8-P11, P13-P16, and P8-P16. For the identification of the Cre gene, we used the following PCR primers: P3066-P3067 and P3067-3068. GATA3<sup>fl/fl</sup> mice were crossed with LysM-Cre mice (purchased from The Jackson Laboratory) to generate homozygous mGATA3KO mice. All mice were bred and maintained in the Cedars-Sinai Medical Center pathogen-free animal facility, and experiments used approved protocols according to the Institutional Animal Care and Use Committee guidelines of Cedars-Sinai Medical Center.

For genotyping, tail samples were collected and lysed at 55°C overnight in 100  $\mu$ l lysis buffer (100 mM Tris-HCl, pH 8.5, 5 mM EDTA, 0.2% SDS, 200 mM NaCl and 1 mg/ml of Proteinase K). After a 1:10 dilution with distilled water, 1  $\mu$ l was used as template for PCR. The sequences of the primers were as follows:

5'-TCAGGGCACTAAGGGTTGTAACTT-3' (P8)  
5'-GAATTCCATCCATGAGACACACAA-3' (P11)  
5'-CAGTCTCTGGTATTGATCTGCTTCTT-3' (P13)  
5'-GTGCAGCAGAGCAGGAAACTCTCAC-3' (P16)  
5'-CCC AGA AAT GCC AGA TTA CG-3' (P3066)  
5'-CTT GGG CTG CCA GAA TTT CTC-3' (P3067)  
5'-TTA CAG TCG GCC AGG CTG AC-3' (P3068)

## Online Table 1. The List of Antibodies Used in Each Experiment with the Direct Link to the Website

### Antibody used for Immunostaining

|                      |                                                      |                                                                                                                                                                                                                                        |
|----------------------|------------------------------------------------------|----------------------------------------------------------------------------------------------------------------------------------------------------------------------------------------------------------------------------------------|
| CL8942AP             | Rat anti-mouse MAC2 (GALECTIN-3)                     | <a href="https://www.cedarlanelabs.com/Products/Detail/CL8942AP">https://www.cedarlanelabs.com/Products/Detail/CL8942AP</a>                                                                                                            |
| AF3626-SP<br>sc-1260 | Goat anti-mouse IL-33<br>Goat anti-mouse IL-4 (C-19) | <a href="https://resources.rndsystems.com/pdfs/datasheets/af3626.pdf">https://resources.rndsystems.com/pdfs/datasheets/af3626.pdf</a><br><a href="https://datasheets.scbt.com/sc-1260.pdf">https://datasheets.scbt.com/sc-1260.pdf</a> |
| HAF-019              | Donkey anti-goat IgG-HRP                             | <a href="https://resources.rndsystems.com/pdfs/datasheets/haf019.pdf">https://resources.rndsystems.com/pdfs/datasheets/haf019.pdf</a>                                                                                                  |
| BA-4001              | Biotinylated Rabbit Anti-Rag IgG                     | <a href="http://docs.vectorlabs.com/protocols/BA-4001.pdf">http://docs.vectorlabs.com/protocols/BA-4001.pdf</a>                                                                                                                        |
| 558686               | Mouse anti-GATA3                                     | <a href="http://www.bdbiosciences.com/ds/pm/tds/558686.pdf">http://www.bdbiosciences.com/ds/pm/tds/558686.pdf</a>                                                                                                                      |

### Antibody used for fluorescent Immunostaining

|            |                                               |                                                                                                                                                                               |
|------------|-----------------------------------------------|-------------------------------------------------------------------------------------------------------------------------------------------------------------------------------|
| sc-22206   | Goat anti-mouse GATA3                         | <a href="https://datasheets.scbt.com/sc-22206.pdf">https://datasheets.scbt.com/sc-22206.pdf</a>                                                                               |
| 14-0112-82 | Rat anti mouse CD11b                          | <a href="http://www.ebioscience.com/media/pdf/tds/14/14-0112.pdf">http://www.ebioscience.com/media/pdf/tds/14/14-0112.pdf</a>                                                 |
| sc-362255  | Donkey anti-goat IgG-CFL 488                  | <a href="https://datasheets.scbt.com/sc-362255.pdf">https://datasheets.scbt.com/sc-362255.pdf</a>                                                                             |
| ab175475   | Donkey Anti-Rat IgG H&L (Alexa Fluor®<br>568) | <a href="http://www.abcam.com/donkey-rat-igg-hl-alex-fluor-568-preadsorbed-ab175475.html">http://www.abcam.com/donkey-rat-igg-hl-alex-fluor-568-preadsorbed-ab175475.html</a> |
| 123110     | PE anti-mouse F4/80 Antibody                  | <a href="http://www.biolegend.com/pe-anti-mouse-f4-80-antibody-4068.html">http://www.biolegend.com/pe-anti-mouse-f4-80-antibody-4068.html</a>                                 |

### Antibody used for Western blot

|          |                       |                                                                                                 |
|----------|-----------------------|-------------------------------------------------------------------------------------------------|
| sc-22206 | Goat anti-mouse GATA3 | <a href="https://datasheets.scbt.com/sc-22206.pdf">https://datasheets.scbt.com/sc-22206.pdf</a> |
| sc-25778 | Rabbit anti GAPDH     | <a href="https://datasheets.scbt.com/sc-25778.pdf">https://datasheets.scbt.com/sc-25778.pdf</a> |

### Antibody used for FACS

|        |                                       |                                                                                                                                                               |
|--------|---------------------------------------|---------------------------------------------------------------------------------------------------------------------------------------------------------------|
| 128018 | PE/Cy7 anti-mouse Ly-6C Antibody      | <a href="http://www.biolegend.com/pe-cy7-anti-mouse-ly-6c-antibody-6063.html">http://www.biolegend.com/pe-cy7-anti-mouse-ly-6c-antibody-6063.html</a>         |
| 127616 | PerCP/Cy5.5 anti-mouse Ly-6G Antibody | <a href="http://www.biolegend.com/percp-cy55-anti-mouse-ly-6g-antibody-6116.html">http://www.biolegend.com/percp-cy55-anti-mouse-ly-6g-antibody-6116.html</a> |
| 150608 | FITC anti-mouse CD192 (CCR2) Antibody | <a href="http://www.biolegend.com/fitc-anti-mouse-cd192-ccr2-antibody-13354.html">http://www.biolegend.com/fitc-anti-mouse-cd192-ccr2-antibody-13354.html</a> |
| 101212 | APC anti-mouse/human CD11b Antibody   | <a href="http://www.biolegend.com/apc-anti-mouse-human-cd11b-antibody-345.html">http://www.biolegend.com/apc-anti-mouse-human-cd11b-antibody-345.html</a>     |
| 123110 | PE anti-mouse F4/80 Antibody          | <a href="http://www.biolegend.com/pe-anti-mouse-f4-80-antibody-4068.html">http://www.biolegend.com/pe-anti-mouse-f4-80-antibody-4068.html</a>                 |

**Online Table 2. The list of primers used to amplify indicated genes are included.**

Primers

| Name     | Forward                 | Reverse              |
|----------|-------------------------|----------------------|
| GAPDH    | TCAAGCTCATTTCCTGGTATGAC | TTACTCCTTGGAGGCCATGT |
| GATA3    | CTTATCAAGCCCAAGCGAAG    | CATTAGCGTTCCTCCTCCAG |
| GATA3E1a | GAGCGTCAGCAACAGTGAAG    | CCACACTGCACACTGATTCC |
| GATA3E1b | CAATCTGACCGGGCAGGT      | CAGAGACGGTTGCTCTTCCG |
| ARG1     | GGTTCTGGGAGGCCTATCTT    | TCCAAGAGTTGGGTTCACT  |

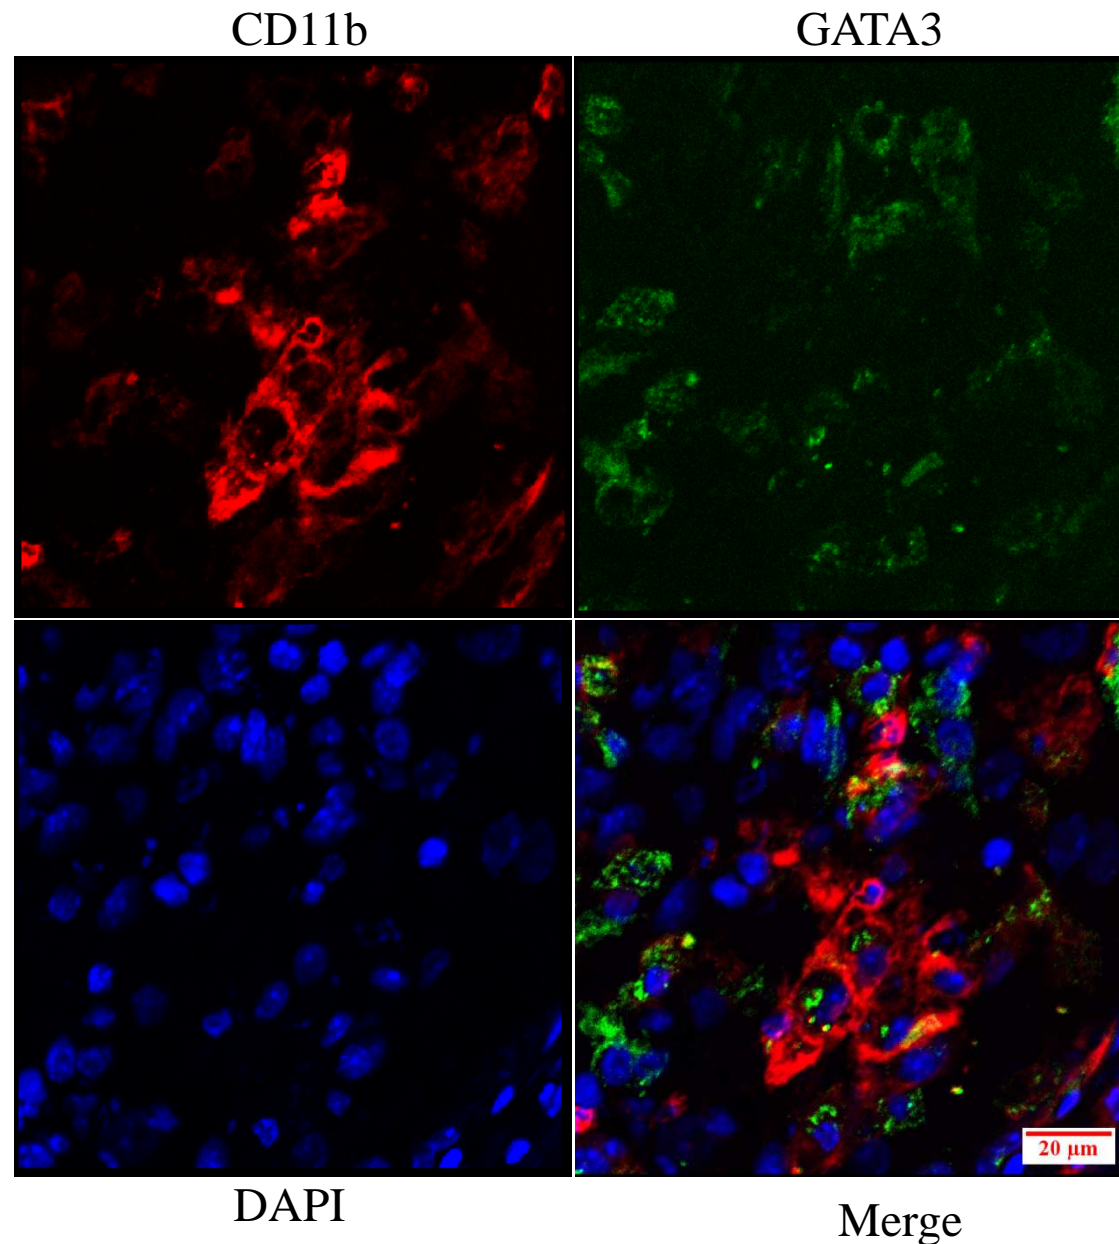

**Online Fig. 2.** A Representative Confocal Image of Immunofluorescence Staining of LV Sections from Cre Mice subjected to MI for Eight Days. The sections were stained with CD11b-AF568 (red), GATA3-CFL488 (green) and DAPI (blue). Magnification at 10 X 63.

Cre

Apex ←

Atrium proximal

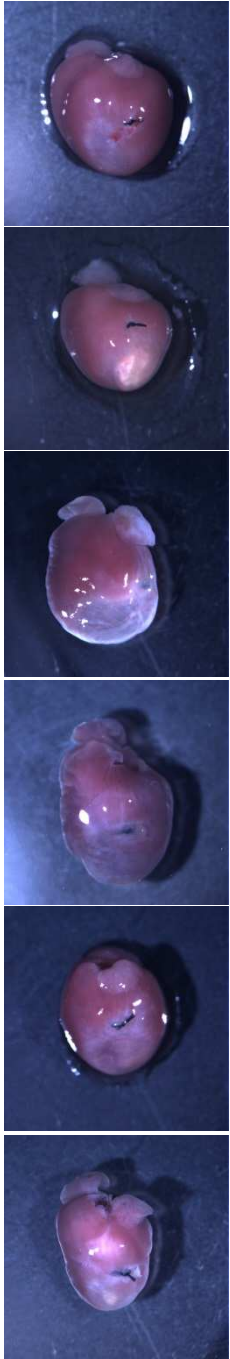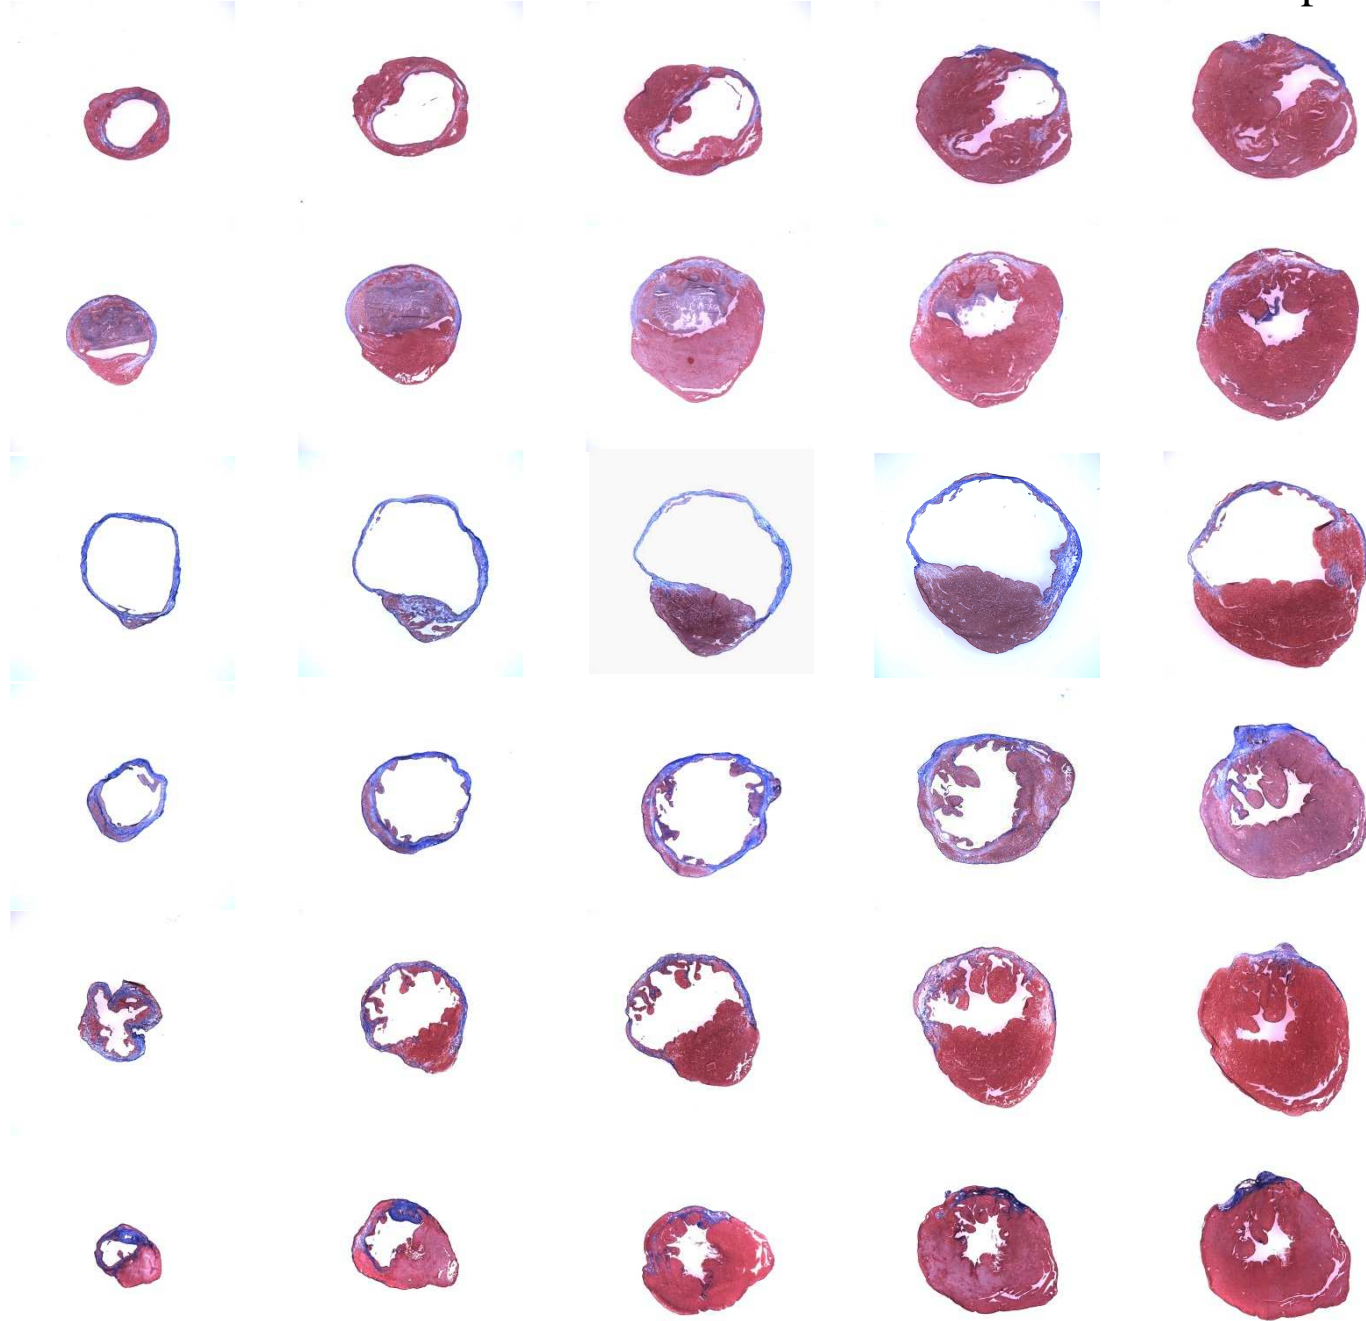

mGATA3KO

Apex ←

→ Atrium proximal

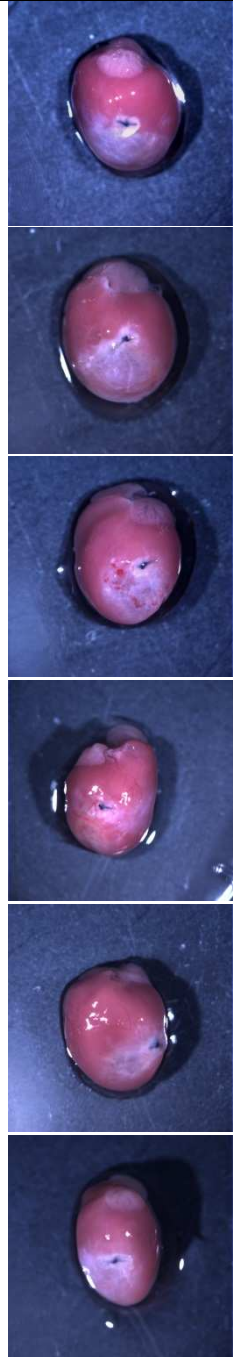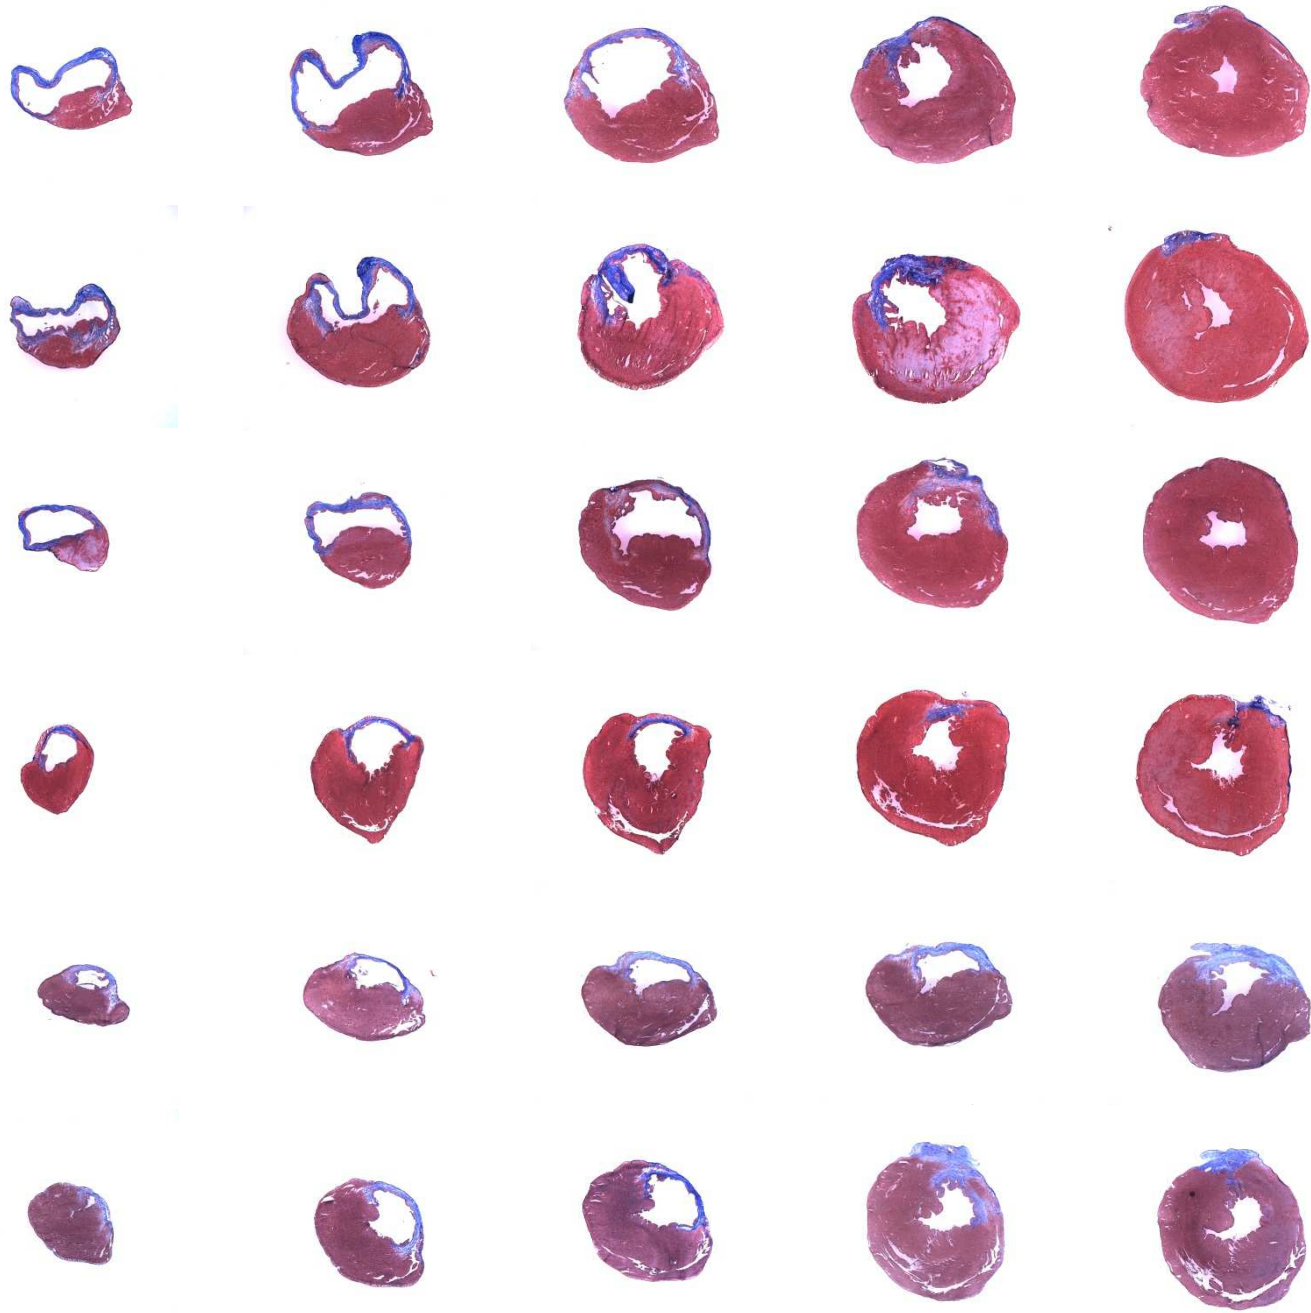

**Online Fig. 3. Photograph of Sections from all the Harvest Hearts from the Two Mice Genotypes After MI.** To analyze the morphology of the ischemic hearts; they were harvested, rapidly frozen in liquid nitrogen, sectioned, and stained for collagen. Morphologically, the mGATA3KO hearts had more myocardium (red stain) and less collagen (blue stain) compared with the control Cre hearts.



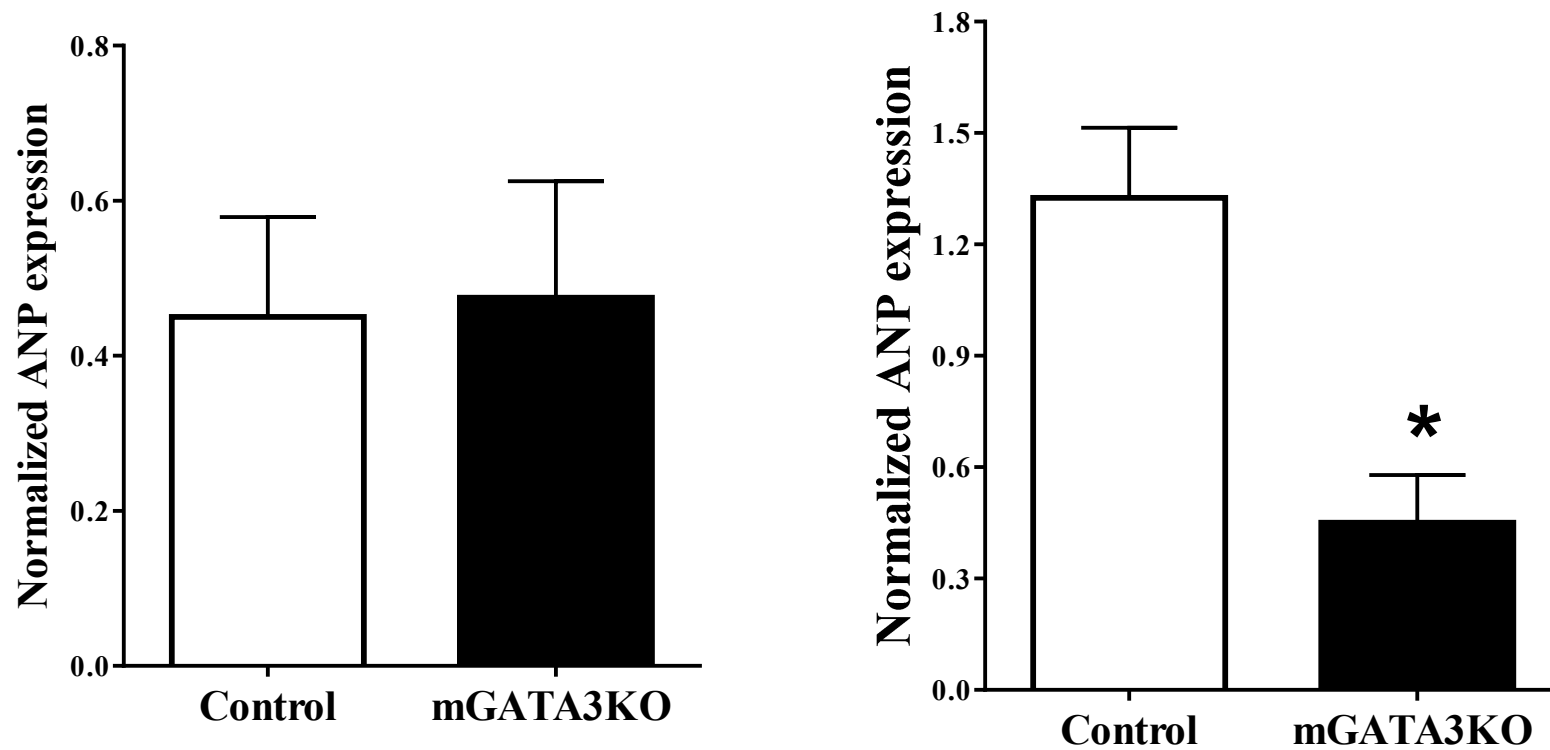

**Online Fig. 4.** Expression of atrial natriuretic factor (ANP) in the control Cre mice before (left panel) and after (right panel) 2 months aortic constriction. There was no significant difference in the expression of ANP between the two mice genotypes before aortic banding; however significant differences ( $p < 0.05$ ) was detected after the banding, designated by \*.

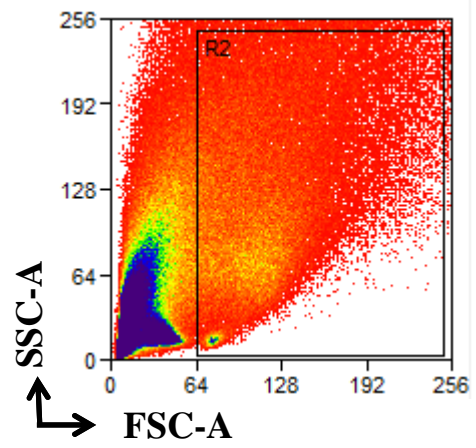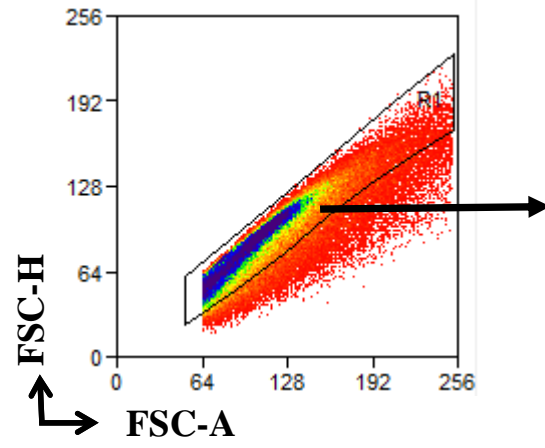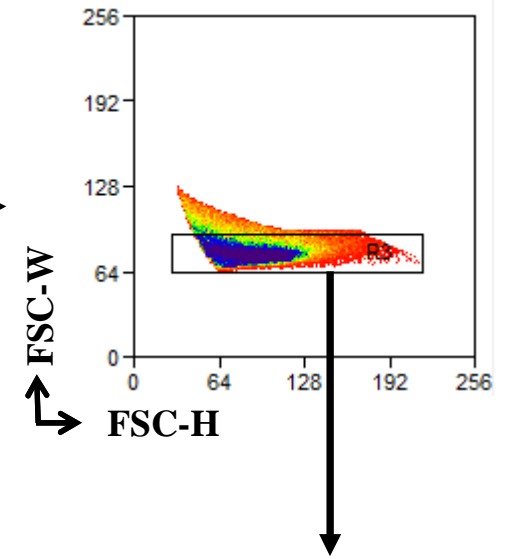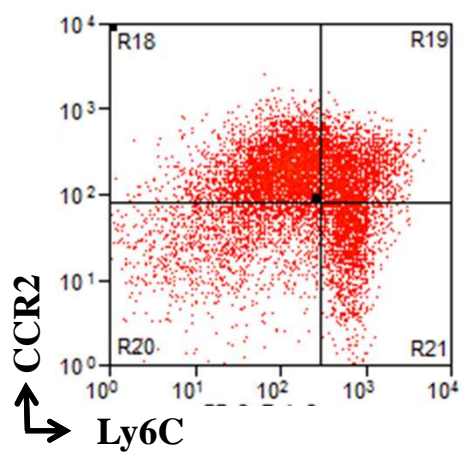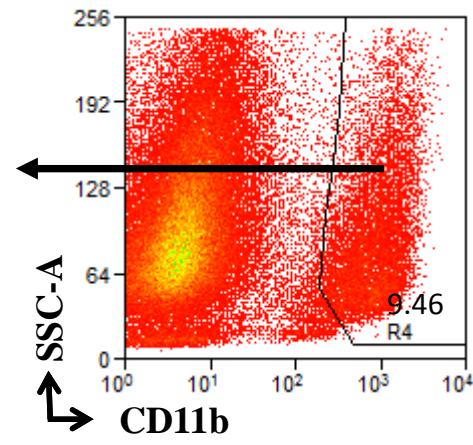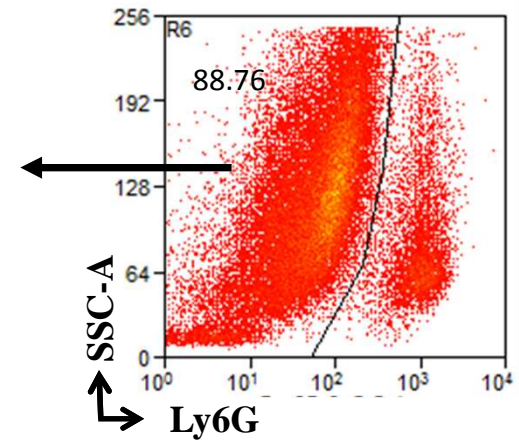

Online Fig. 4.

### **Online Fig. 5. Basic Flow Cytometry Gating Strategy and Phenotypic Definitions of Granulocyte and Monocyte Subsets.**

Cells were gated on a forward scatter/side scatter (FSC/SSC) plot. After separation of the single cell population, leukocytes were then further gated to determine Ly6G-positive and Ly6G-negative cells. Ly6G-negative cells were further gated for CD11b-positive cells representing the total monocyte population. Monocytes were further gated into the main subsets based on the CCR2/Ly6C expression properties. The list of antibodies used in the flow cytometry experiments are included in **Online Table 1**.

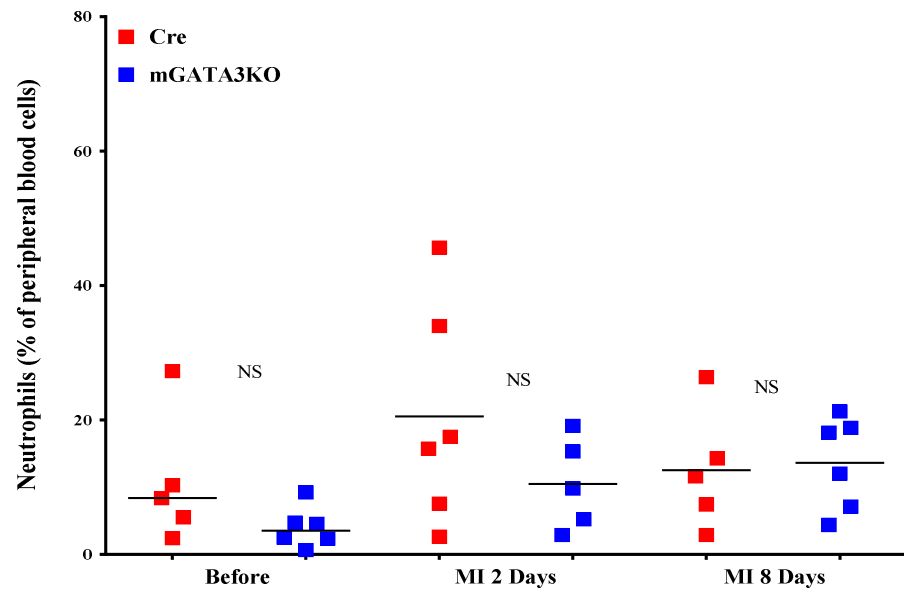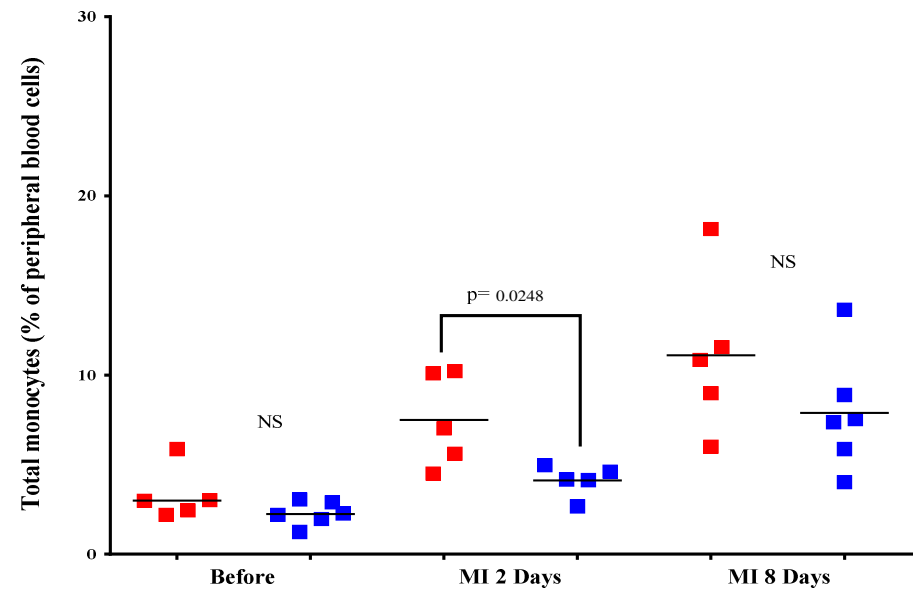

Online Fig. 5.

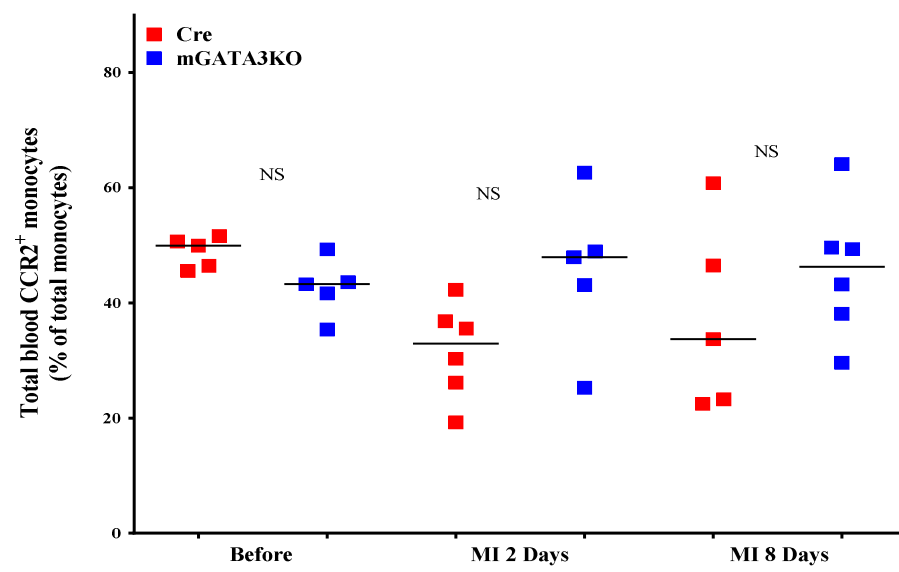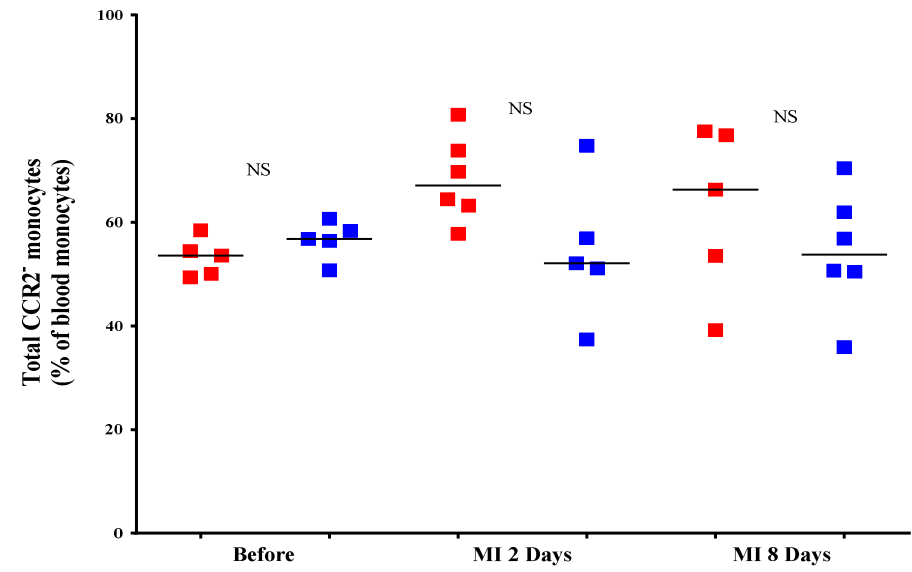

**Online Fig. 5.**

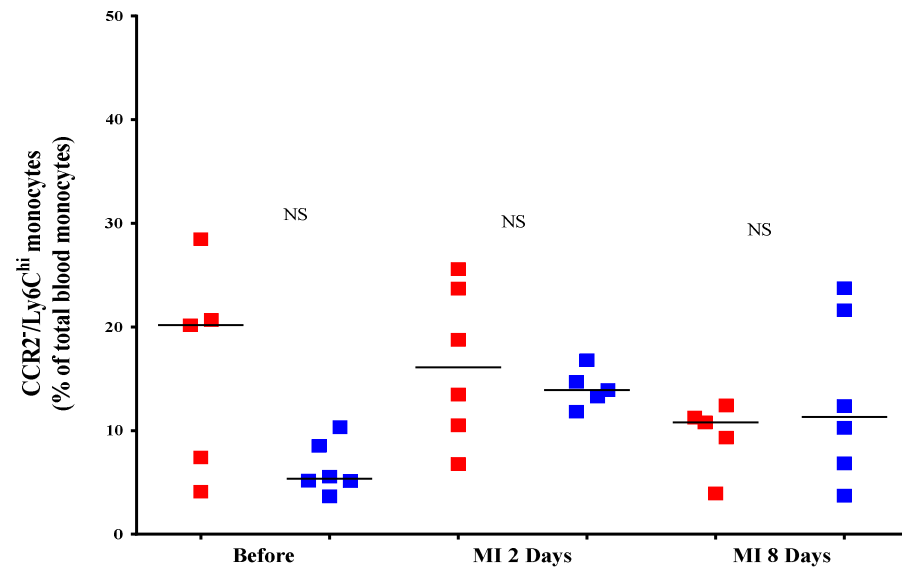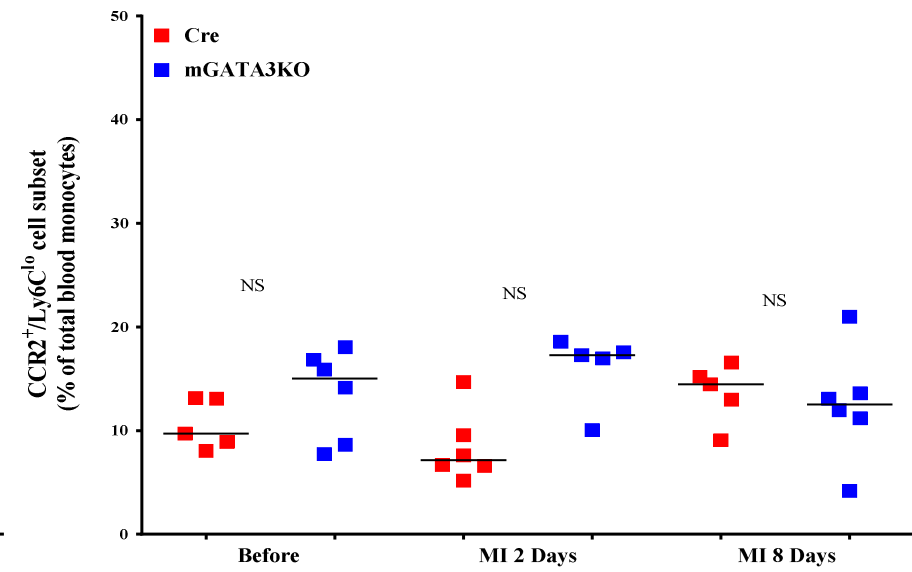

Online Fig. 5.

**Online Fig. 6. White Blood Cells from Peripheral Blood From the Two Mouse Genotypes Analyzed by Flow Cytometry.**

White blood cells were collected from the peripheral blood before and after MI, and analyzed by flow cytometry. The gating strategy is outlined **Online Fig. 4**). Each data point represent one mouse/genotype.

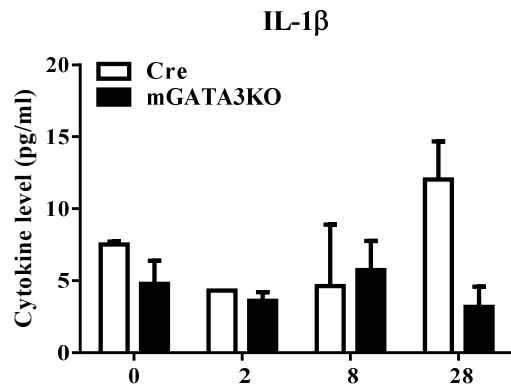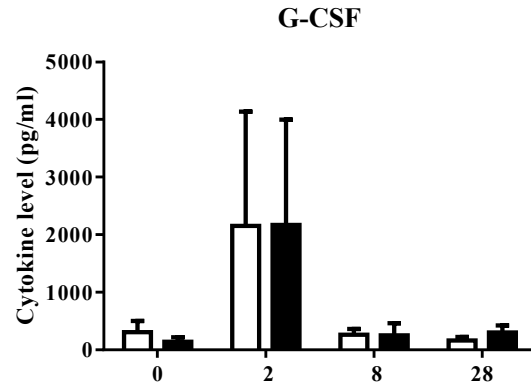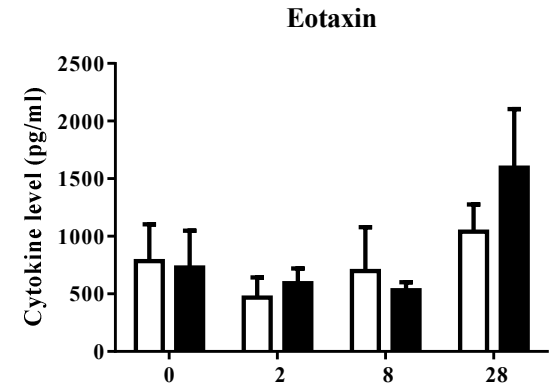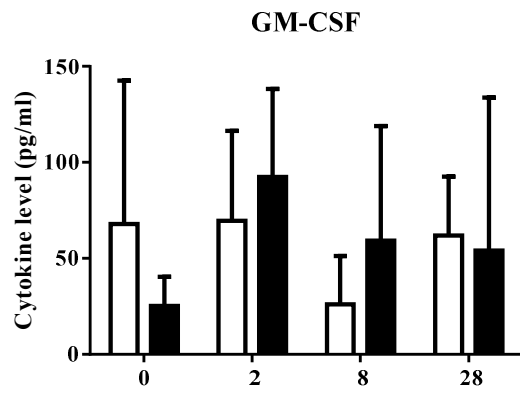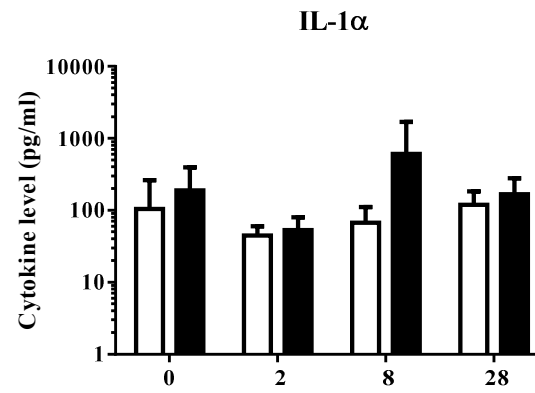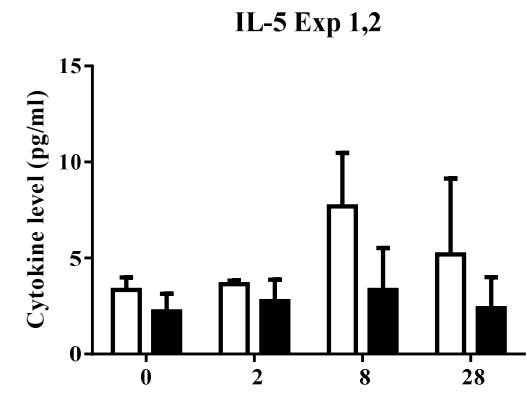

**Online Fig. 6.**



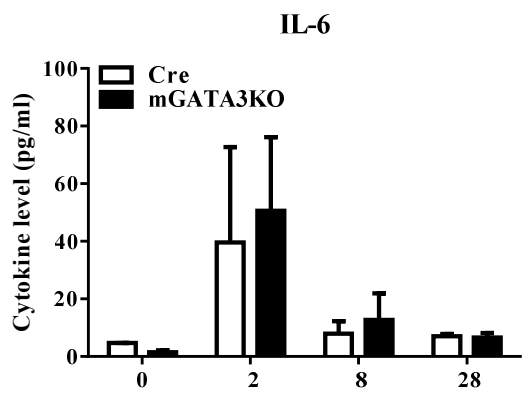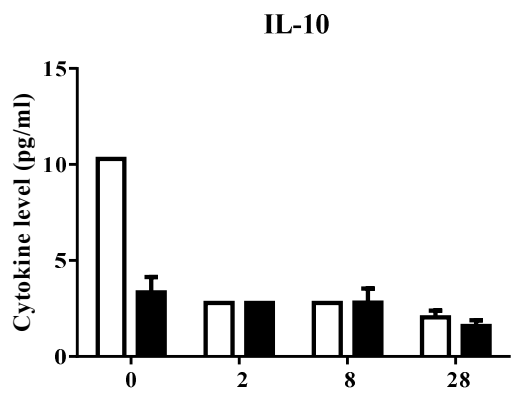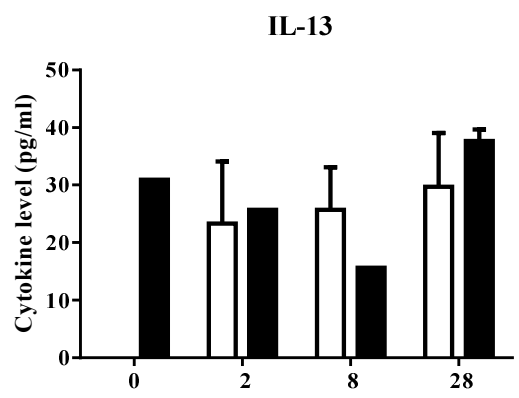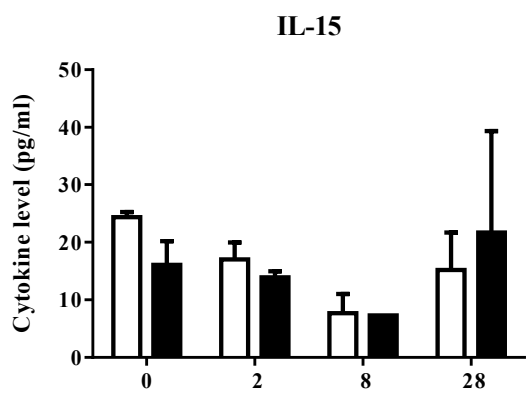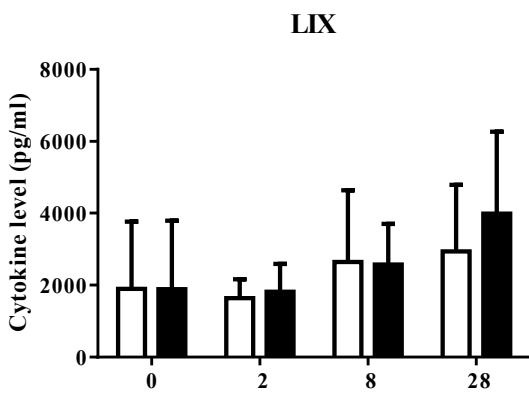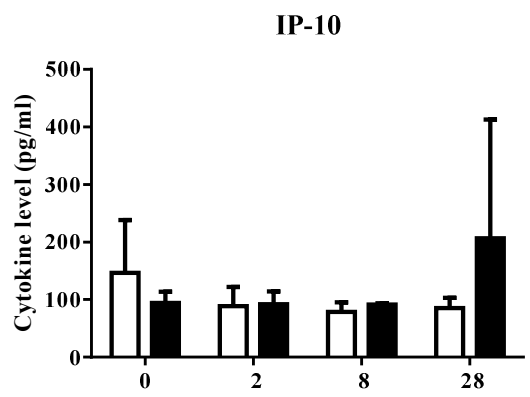

**Online Fig. 6.**

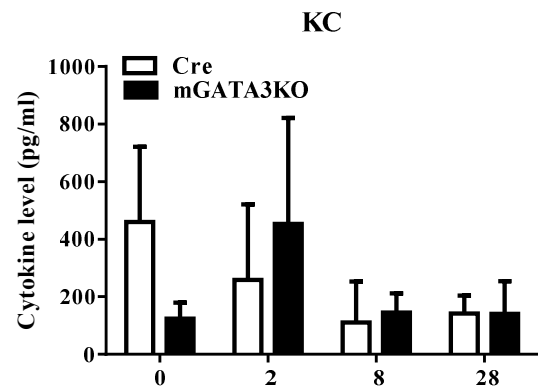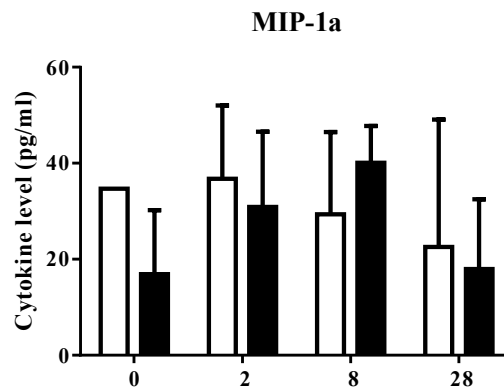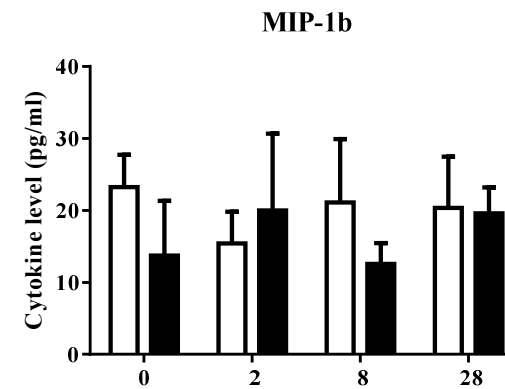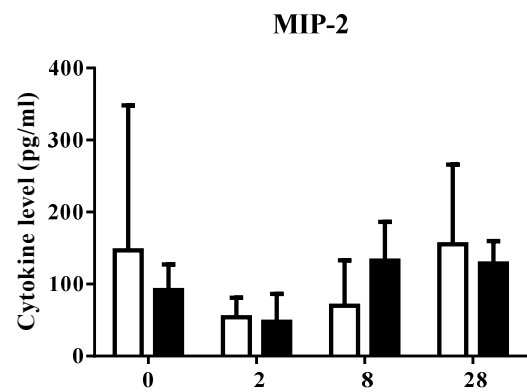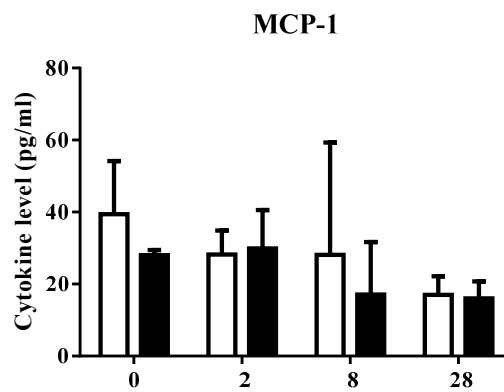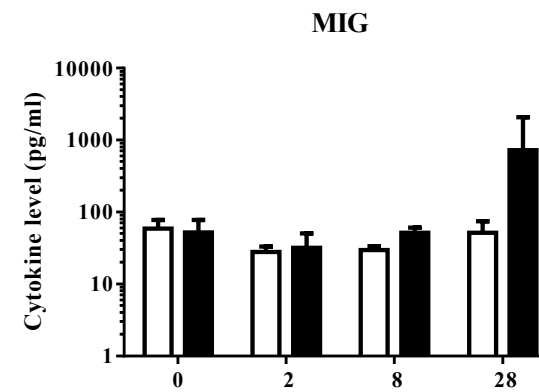

**Online Fig. 6.**

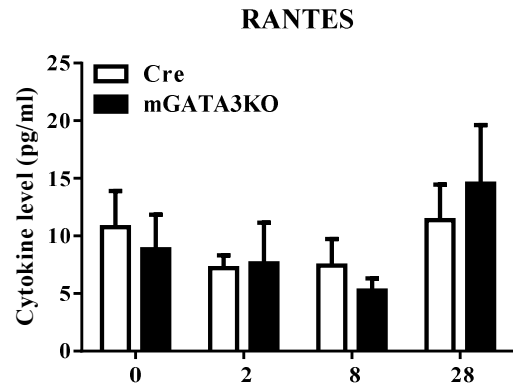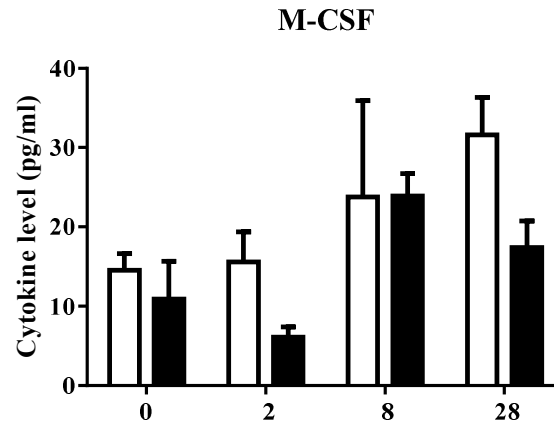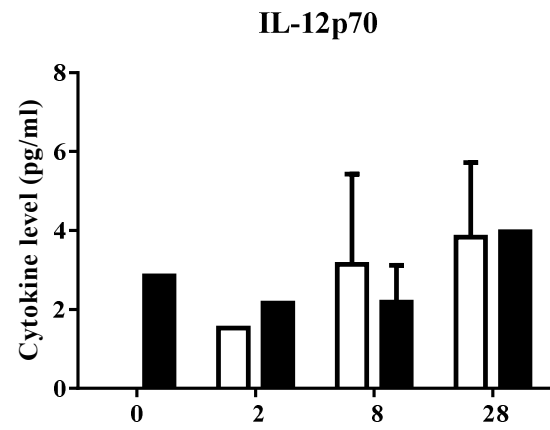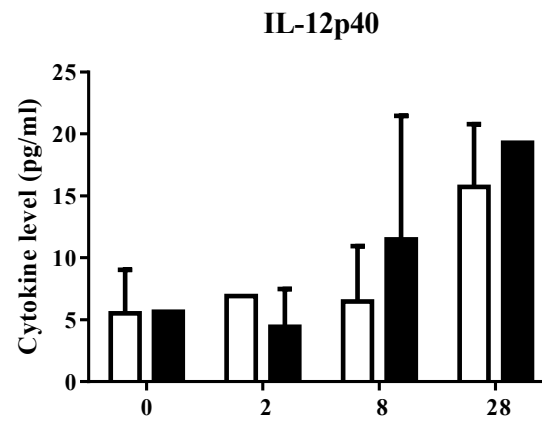

**Online Fig. 6.**

**Online Fig. 7. Analysis of Serum Proteins From the Two Mice Genotypes Before and After MI.**

Serum was collected from the two mouse genotypes (4 mice/time point/genotype), and the serum proteins were analyzed for the presence of indicated growth factors and cytokines. We did not detect major changes in the composition of the serum proteins between the two mice genotypes before and after MI.
